# Supplementary material for: First-tier detection of intragenomic 16S rRNA gene variation in culturable endophytic bacteria from cacao seeds
Source: PeerJ journal article supplement (doi:10.7717/peerj.7452), 2019-11-20

\_da Silva et al, PEERJ \_SUPPL Mat--16S rDNA AMPLIFICATION [ da Silva CB, et al. First-tier detection of intragenomic 16S rRNA gene variation in culturable endophytic bacteria from cacao seeds ]

**PCR products, amplified by 799F and U1492R primers, used to compose Figure 1.**

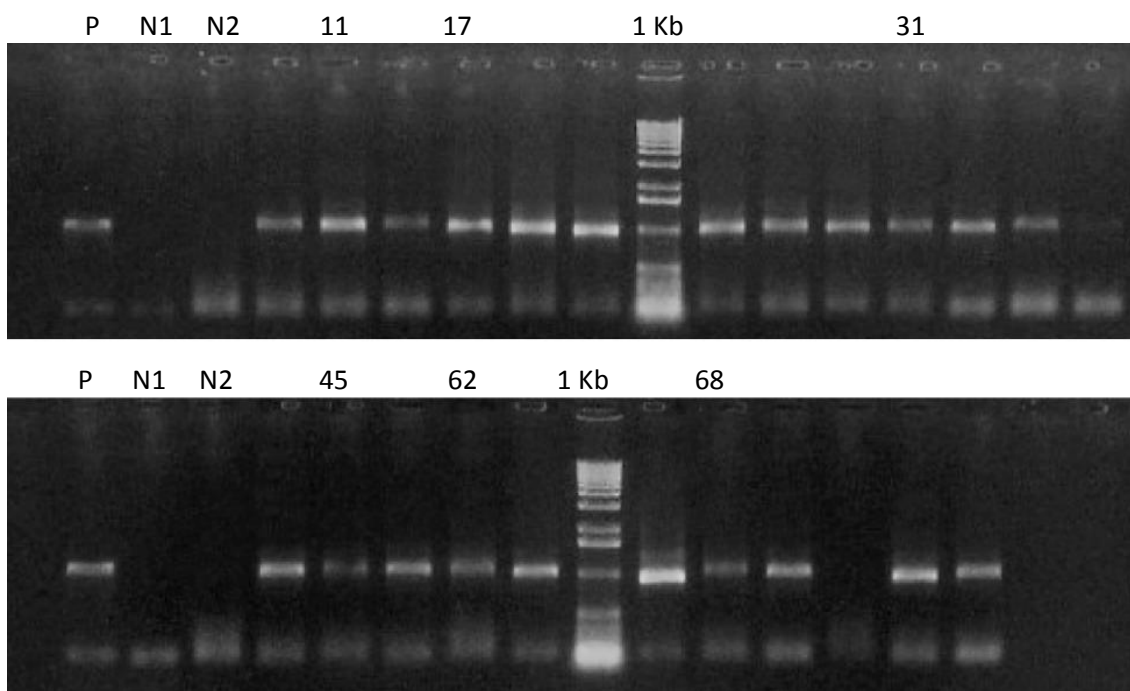

P – Positive control

N1 – Negative control without DNA sample

N2 – Negative control without Reverse primer

\_da Silva et al, PEERJ \_SUPPL Mat--RESTRICTION PROFILES OF BACTERIAL ENDOPHYTES [ da Silva CB, et al. First-tier detection of intragenomic 16S rRNA gene variation in culturable endophytic bacteria from cacao seeds ]

***AluI* restriction profiles of bacterial endophytes from cacao, amplified by 799F and U1492R primers, used to compose Figure 1.**

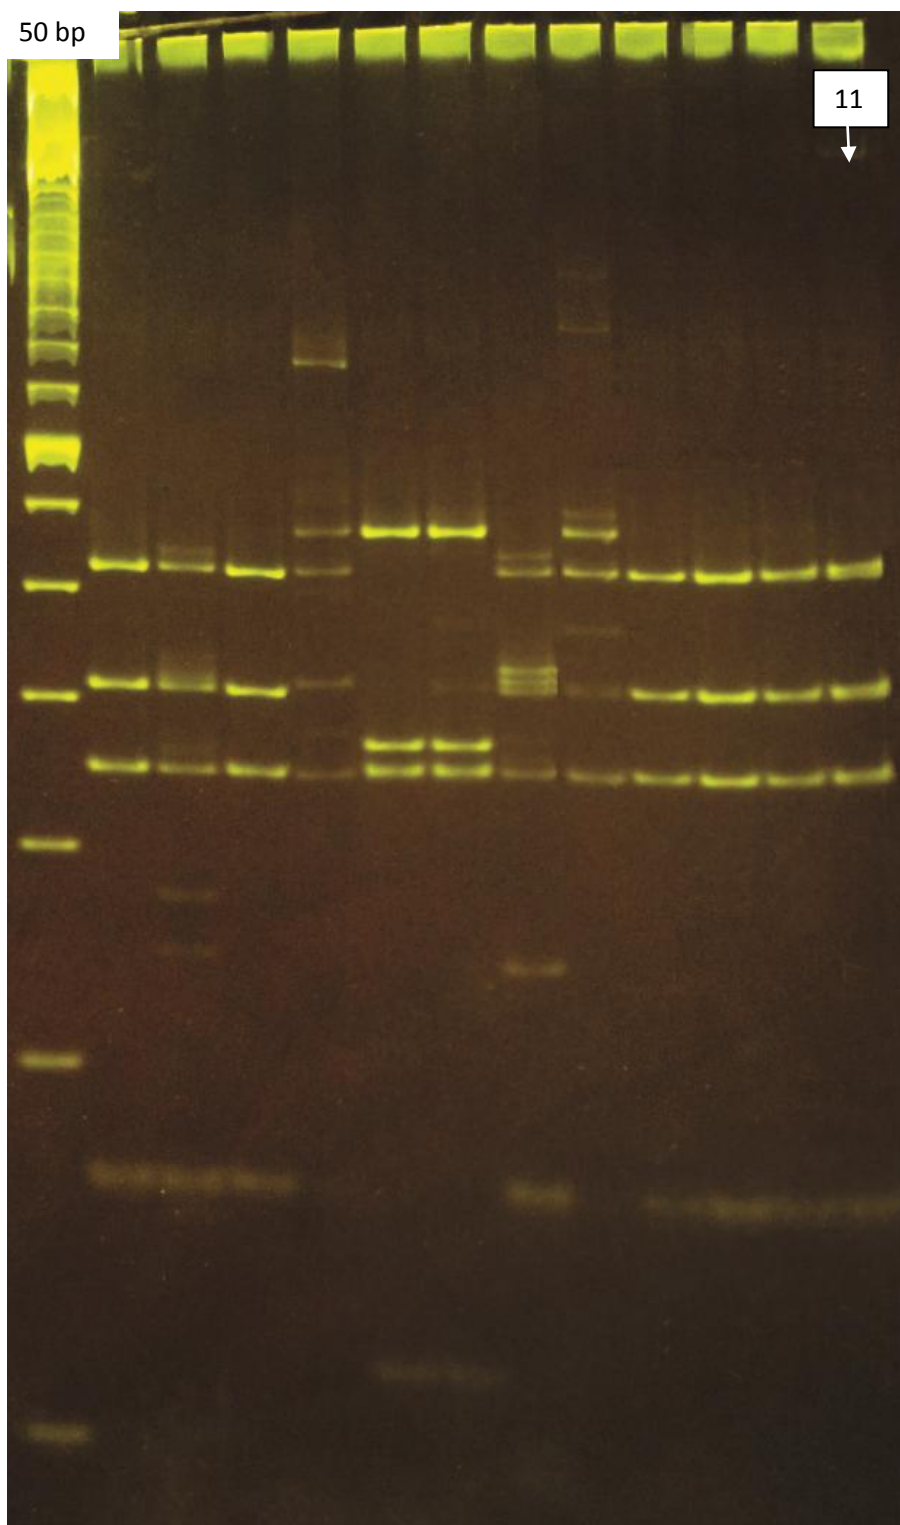

50 bp

31

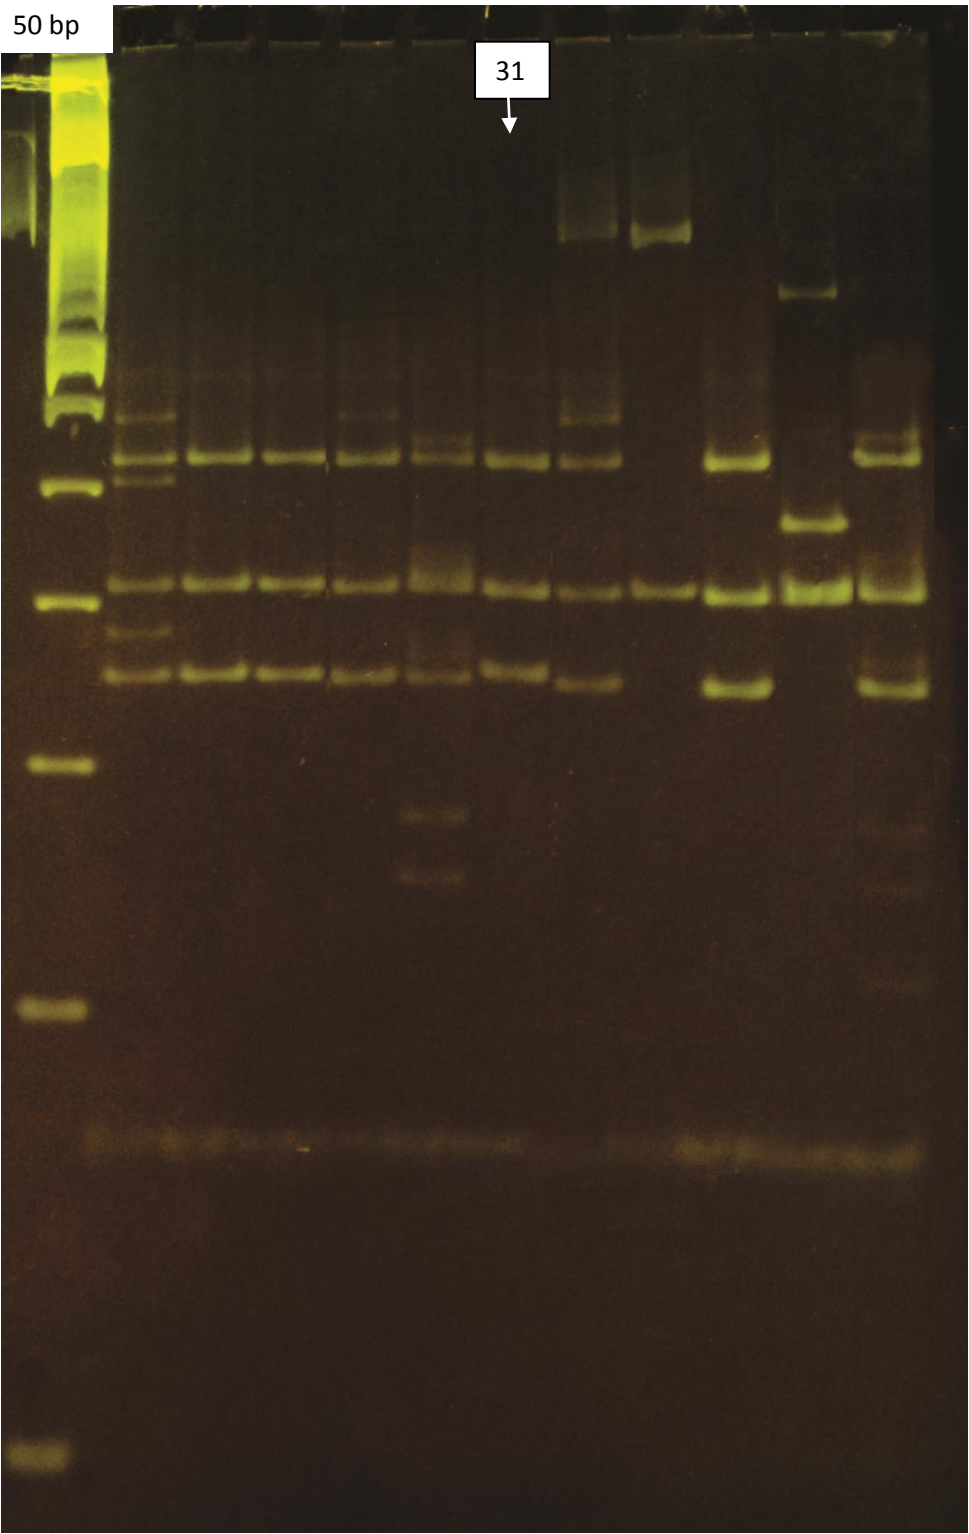

50 bp

62  
↓

68  
↓

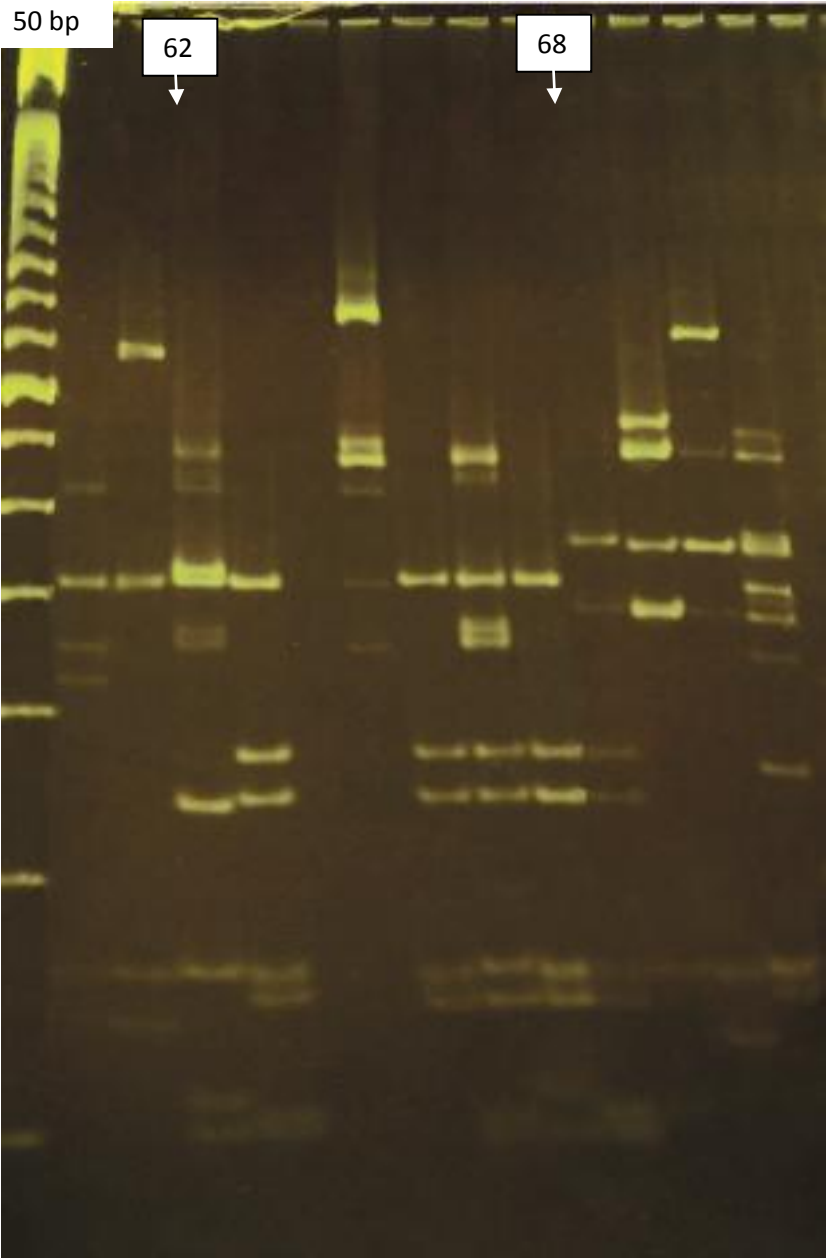

50 bp

45

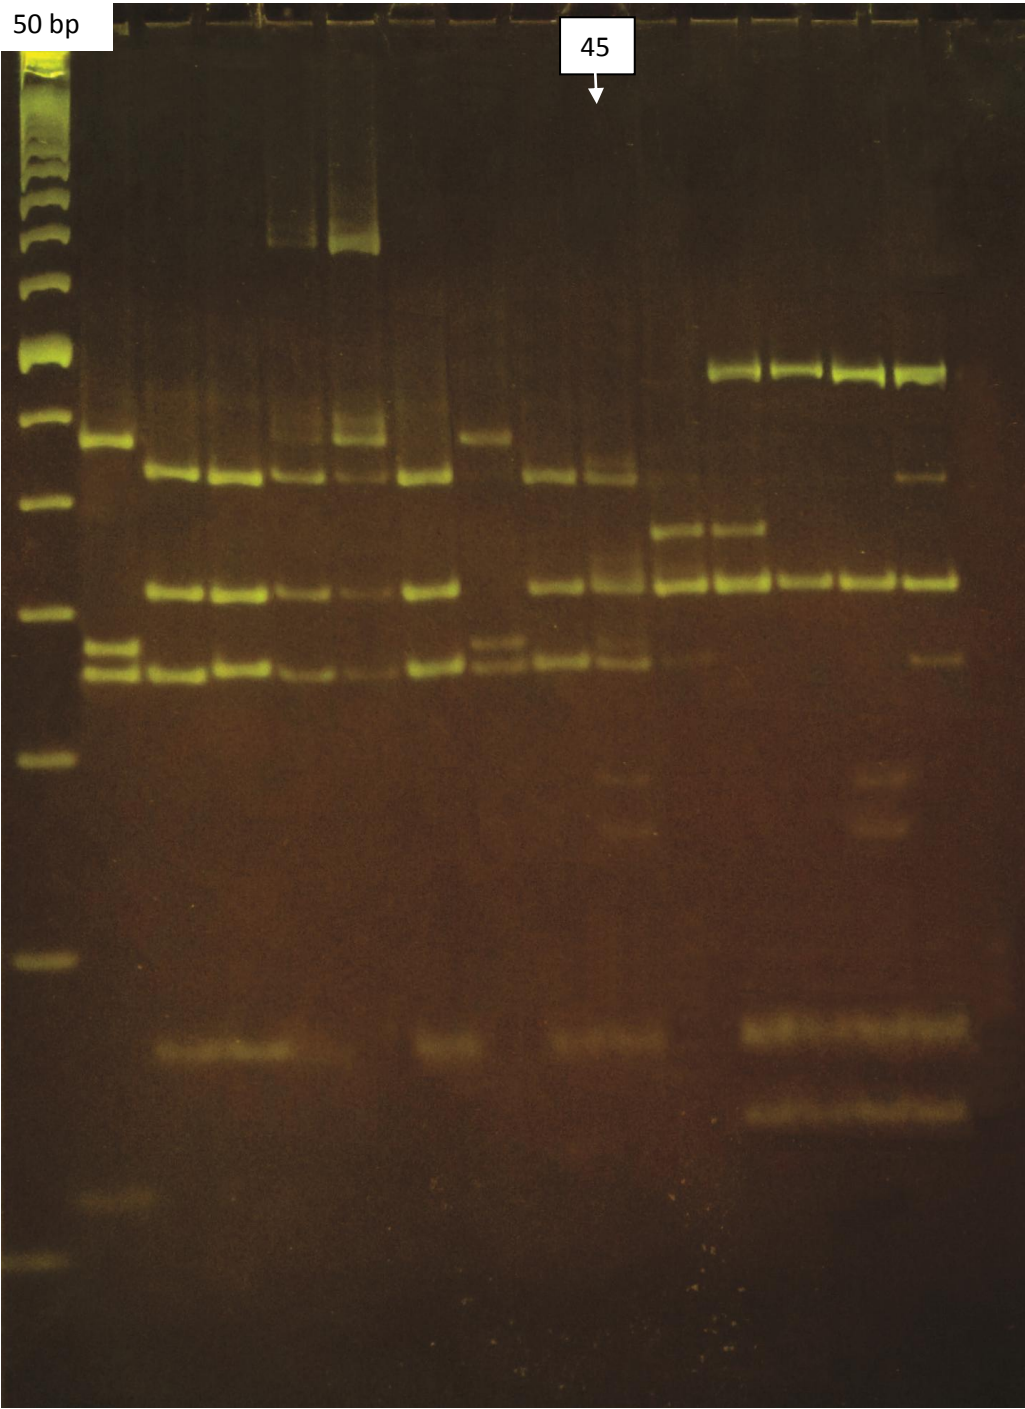

50 bp

17

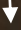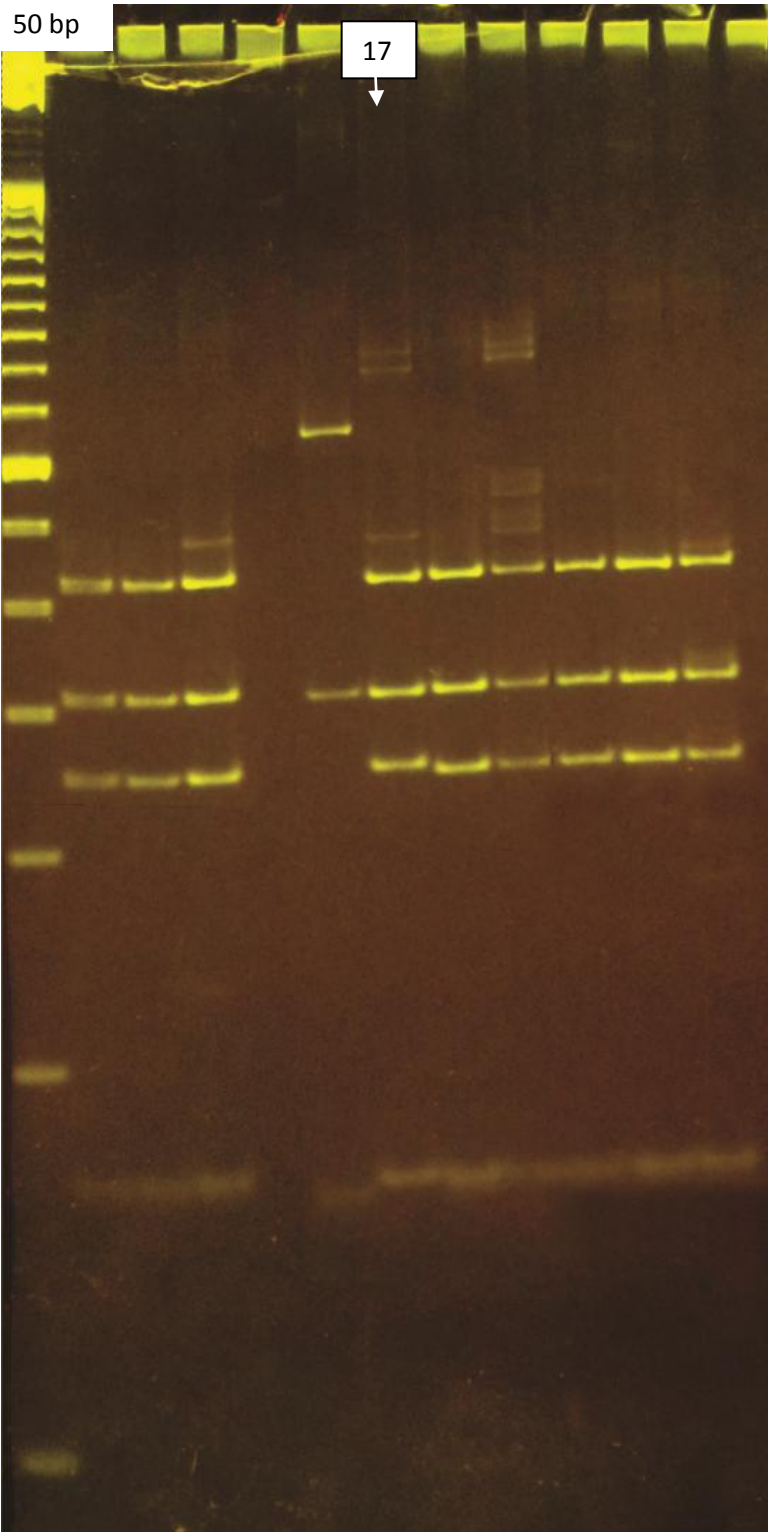

Supplement: _da_Silva_et_al_PeerJ_SUPPL_Mat_Original-GELS--Fig1.pdf [file _da_Silva_et_al_PeerJ_SUPPL_Mat_Original-GELS--Fig1.pdf]
